# Supplementary material
Source: PubMed Central journal article supplement (PMC10117581)
Supplement: NIHMS1872552-supplement-Supplemental_Material.pdf [file NIHMS1872552-supplement-Supplemental_Material.pdf]

## Supplemental Tables

**Table S1. Pearson's correlation coefficient matrix for the 7 cognitive domain outcomes**

|                        | <b>Episodic<br/>Memory</b> | <b>Attention</b> | <b>Processing<br/>Speed</b> | <b>Working<br/>Memory</b> | <b>Executive<br/>Function</b> | <b>Verbal<br/>Fluency</b> | <b>Fine Motor<br/>&amp; Dexterity</b> |
|------------------------|----------------------------|------------------|-----------------------------|---------------------------|-------------------------------|---------------------------|---------------------------------------|
| Episodic Memory        | -                          | 0.29             | 0.44                        | 0.43                      | 0.45                          | 0.29                      | 0.26                                  |
| Attention              |                            | -                | 0.49                        | 0.31                      | 0.4                           | 0.29                      | 0.36                                  |
| Processing Speed       |                            |                  | -                           | 0.37                      | 0.44                          | 0.38                      | 0.43                                  |
| Working Memory         |                            |                  |                             | -                         | 0.44                          | 0.42                      | 0.25                                  |
| Executive Function     |                            |                  |                             |                           | -                             | 0.27                      | 0.3                                   |
| Verbal Fluency         |                            |                  |                             |                           |                               | -                         | 0.19                                  |
| Fine Motor & Dexterity |                            |                  |                             |                           |                               |                           | -                                     |

Note: P-values are always significant because of the large sample size of our study

**Table S2. Variance Inflation factor (VIF) for Primary Analysis**

|                                          | <b>Episodic<br/>Memory</b> | <b>Attention</b> | <b>Processing<br/>Speed</b> | <b>Working<br/>Memory</b> | <b>Executive<br/>Function</b> | <b>Verbal<br/>Fluency</b> | <b>Fine Motor<br/>&amp; Dexterity</b> |
|------------------------------------------|----------------------------|------------------|-----------------------------|---------------------------|-------------------------------|---------------------------|---------------------------------------|
| mTBI Group (0, 1-2, 3+)                  | 1.1                        | 1.1              | 1.1                         | 1.1                       | 1.1                           | 1.1                       | 1.1                                   |
| Age                                      | 1.3                        | 1.3              | 1.3                         | 1.3                       | 1.3                           | 1.3                       | 1.3                                   |
| Gender                                   | 1.2                        | 1.2              | 1.2                         | 1.2                       | 1.2                           | 1.2                       | 1.2                                   |
| Race/Ethnicity                           | 1.1                        | 1.1              | 1.1                         | 1.1                       | 1.1                           | 1.1                       | 1.1                                   |
| Married                                  | 1.1                        | 1.1              | 1.1                         | 1.1                       | 1.1                           | 1.1                       | 1.1                                   |
| Education                                | 1.1                        | 1.1              | 1.1                         | 1.1                       | 1.1                           | 1.1                       | 1.1                                   |
| BMI                                      | 1.1                        | 1.1              | 1.1                         | 1.1                       | 1.1                           | 1.1                       | 1.1                                   |
| AD(H)D                                   | 1                          | 1                | 1                           | 1                         | 1                             | 1                         | 1                                     |
| Service Branch                           | 1.1                        | 1.1              | 1.1                         | 1.1                       | 1.1                           | 1.1                       | 1.1                                   |
| Current Military                         | 1.1                        | 1.1              | 1.1                         | 1.1                       | 1.1                           | 1.1                       | 1.1                                   |
| Deployed duration (years)                | 1.2                        | 1.2              | 1.2                         | 1.2                       | 1.2                           | 1.2                       | 1.2                                   |
| Combat Intensity (DRRI-2-C)              | 1.3                        | 1.3              | 1.3                         | 1.3                       | 1.3                           | 1.3                       | 1.3                                   |
| Depression (PHQ-9)                       | 1.9                        | 1.9              | 1.9                         | 1.9                       | 1.9                           | 1.9                       | 1.9                                   |
| Pain Interference (TBI-QOL)              | 1.5                        | 1.5              | 1.5                         | 1.5                       | 1.5                           | 1.5                       | 1.5                                   |
| Premorbid IQ est<br>(NIHTB-CB pic vocab) | 1.2                        | 1.2              | 1.2                         | 1.2                       | 1.2                           | 1.2                       | 1.2                                   |
| PTSD (PCL-5)                             | 2                          | 2                | 2                           | 2                         | 2                             | 2                         | 2                                     |
| Hazardous Alcohol use (AUDIT-C)          | 1                          | 1                | 1                           | 1                         | 1                             | 1                         | 1                                     |
| Sleep Problems (PSQI)                    | 1.4                        | 1.4              | 1.4                         | 1.4                       | 1.4                           | 1.4                       | 1.4                                   |
| Sleep Apnea High Risk (STOP-BANG)        | 1.3                        | 1.3              | 1.3                         | 1.3                       | 1.3                           | 1.3                       | 1.3                                   |
| Controlled Blast Exposures               | 1.1                        | 1.1              | 1.1                         | 1.1                       | 1.1                           | 1.1                       | 1.1                                   |
| Somatosensory Symptoms (NSI)             | 1.8                        | 1.8              | 1.8                         | 1.8                       | 1.8                           | 1.8                       | 1.8                                   |
| Vestibular Symptoms (NSI)                | 1.5                        | 1.5              | 1.5                         | 1.5                       | 1.5                           | 1.5                       | 1.5                                   |

Note: Table values are generalized VIF,  $GVIF^{1/(2*Df)}$ . If this value <2.4, there is no evidence of multicollinearity. The threshold is equivalent to conventional VIF<5.

Abbreviations: ADHD = Attention Deficit Hyperactivity Disorder; AUDIT-C= Alcohol Use Disorders Test Consumption; DAST-10= Drug Abuse Screening Test- 10;

DRRI-2= Deployment Risk and Resiliency Inventory, Version 2; NIH TB-CB = NIH Toolbox Cognition battery; NSI= Neurobehavioral Symptom Inventory;

PCL-5= PTSD Checklist for the Diagnostic and Statistical Manual, 5th edition; PSQI= Pittsburgh Sleep Quality Index; PHQ-9=Patient Health Questionnaire-9;

TBI QoL= Traumatic Brain Injury Quality of Life;

**Table S3A. Sensitivity Analysis with # lifetime mTBIs of any etiology as a continuous variable**

| variable                                        | Episodic Memory         |         |             | Attention               |         |             | Processing Speed        |         |             | Working Memory          |         |             |
|-------------------------------------------------|-------------------------|---------|-------------|-------------------------|---------|-------------|-------------------------|---------|-------------|-------------------------|---------|-------------|
|                                                 | Coefficient<br>(95% CI) | p-value |             | Coefficient<br>(95% CI) | p-value |             | Coefficient<br>(95% CI) | p-value |             | Coefficient<br>(95% CI) | p-value |             |
|                                                 |                         | Raw     | Adjust      |
| <b>Number of mTBI</b>                           | 0.01 (-0.01, 0.03)      | 0.44    | 1           | 0.00 (-0.03, 0.03)      | 0.85    | 1           | -0.01 (-0.03, 0.01)     | 0.34    | 1           | 0.01 (-0.01, 0.03)      | 0.53    | 1           |
| <b>Age</b>                                      | -0.03 (-0.03,-0.02)     | <0.001  | <b>0.01</b> | -0.03 (-0.03,-0.02)     | <0.001  | <b>0.01</b> | -0.03 (-0.04,-0.03)     | <0.001  | <b>0.01</b> | -0.02 (-0.03,-0.02)     | <0.001  | <b>0.01</b> |
| <b>Gender: Male</b>                             | -0.29 (-0.43,-0.15)     | <0.001  | <b>0.01</b> | -0.10 (-0.29, 0.10)     | 0.34    | 0.69        | -0.36 (-0.50,-0.22)     | <0.001  | <b>0.01</b> | 0.10 (-0.03, 0.23)      | 0.15    | 0.6         |
| <b>Race/Ethnicity: Non-Hispanic White/Asian</b> | 0.07 (-0.03, 0.16)      | 0.16    | 0.52        | 0.17 ( 0.04, 0.30)      | 0.012   | 0.06        | 0.07 (-0.02, 0.17)      | 0.13    | 0.52        | 0.13 ( 0.04, 0.21)      | 0.006   | <b>0.04</b> |
| <b>Married: Married/couple</b>                  | 0.08 (-0.02, 0.18)      | 0.13    | 0.78        | 0.01 (-0.13, 0.15)      | 0.86    | 1           | 0.09 (-0.02, 0.19)      | 0.10    | 0.7         | 0.05 (-0.05, 0.14)      | 0.32    | 1           |
| Never married                                   | 0.03 (-0.10, 0.16)      | 0.60    | 1           | -0.04 (-0.22, 0.15)     | 0.69    | 1           | -0.04 (-0.17, 0.09)     | 0.56    | 1           | 0.03 (-0.10, 0.15)      | 0.69    | 1           |
| <b>Education: Some College</b>                  | -0.04 (-0.17, 0.08)     | 0.48    | 0.64        | 0.12 (-0.06, 0.30)      | 0.18    | 0.64        | 0.10 (-0.02, 0.23)      | 0.11    | 0.55        | 0.24 ( 0.12, 0.36)      | <0.001  | <b>0.01</b> |
| College Graduate                                | -0.03 (-0.16, 0.10)     | 0.67    | 0.67        | 0.11 (-0.08, 0.29)      | 0.26    | 0.52        | 0.21 ( 0.08, 0.34)      | 0.002   | <b>0.01</b> | 0.21 ( 0.08, 0.34)      | 0.001   | <b>0.01</b> |
| <b>BMI</b>                                      | 0.00 (-0.01, 0.01)      | 0.44    | 1           | 0.00 (-0.01, 0.01)      | 0.72    | 1           | 0.00 (-0.01, 0.01)      | 0.43    | 1           | 0.00 (-0.01, 0.01)      | 0.96    | 1           |
| <b>ADHD?: Yes</b>                               | -0.17 (-0.32,-0.01)     | 0.035   | 0.25        | 0.06 (-0.16, 0.28)      | 0.59    | 1           | -0.05 (-0.20, 0.10)     | 0.53    | 1           | -0.05 (-0.20, 0.10)     | 0.52    | 1           |
| <b>Service Branch: Army</b>                     | -0.02 (-0.13, 0.09)     | 0.73    | 1           | -0.10 (-0.26, 0.05)     | 0.18    | 1           | -0.03 (-0.14, 0.08)     | 0.61    | 1           | -0.06 (-0.17, 0.04)     | 0.23    | 1           |
| Marine Corps                                    | -0.02 (-0.16, 0.13)     | 0.82    | 1           | 0.10 (-0.10, 0.31)      | 0.33    | 1           | 0.02 (-0.13, 0.16)      | 0.82    | 1           | 0.00 (-0.14, 0.14)      | 0.96    | 1           |
| <b>Current Military: Yes</b>                    | 0.10 (-0.01, 0.21)      | 0.07    | 0.42        | 0.10 (-0.05, 0.26)      | 0.19    | 0.95        | 0.03 (-0.08, 0.14)      | 0.62    | 1           | 0.13 ( 0.02, 0.23)      | 0.017   | 0.12        |
| <b>Deployed Time (yr)</b>                       | -0.01 (-0.05, 0.04)     | 0.75    | 1           | -0.01 (-0.07, 0.05)     | 0.69    | 1           | 0.04 (-0.01, 0.08)      | 0.09    | 0.63        | 0.02 (-0.02, 0.06)      | 0.44    | 1           |
| <b>Combat Intensity (10 × DRRI-2-C)</b>         | 0.00 (-0.04, 0.03)      | 0.81    | 1           | 0.04 (-0.01, 0.09)      | 0.09    | 0.63        | 0.01 (-0.02, 0.05)      | 0.46    | 1           | -0.02 (-0.05, 0.01)     | 0.24    | 1           |
| <b>Depression (PHQ9)</b>                        | 0.00 (-0.01, 0.01)      | 0.96    | 1           | -0.01 (-0.03, 0.01)     | 0.39    | 1           | 0.00 (-0.01, 0.01)      | 0.94    | 1           | 0.00 (-0.01, 0.01)      | 0.85    | 1           |
| <b>Pain (TBIQOL)</b>                            | 0.00 ( 0.00, 0.01)      | 0.29    | 1           | 0.00 (-0.01, 0.01)      | 0.52    | 1           | 0.00 ( 0.00, 0.01)      | 0.25    | 1           | 0.00 (-0.01, 0.00)      | 0.36    | 1           |
| <b>Premorbid IQ est (NIHTB-CB pic vocab)</b>    | 0.02 ( 0.02, 0.03)      | <0.001  | <b>0.01</b> | 0.01 ( 0.00, 0.02)      | 0.003   | <b>0.01</b> | 0.01 ( 0.01, 0.02)      | <0.001  | <b>0.01</b> | 0.03 ( 0.02, 0.03)      | <0.001  | <b>0.01</b> |
| <b>PTSD (PCL5)</b>                              | 0.00 (-0.01, 0.00)      | 0.037   | 0.22        | 0.00 (-0.01, 0.00)      | 0.10    | 0.4         | 0.00 (-0.01, 0.00)      | 0.21    | 0.63        | 0.00 (-0.01, 0.00)      | 0.044   | 0.22        |
| <b>ETOH (AUDIT-C): Yes, non-hazardous</b>       | -0.03 (-0.12, 0.06)     | 0.58    | 1           | -0.02 (-0.14, 0.11)     | 0.80    | 1           | -0.03 (-0.12, 0.06)     | 0.51    | 1           | 0.03 (-0.05, 0.12)      | 0.47    | 1           |
| Not user                                        | -0.10 (-0.22, 0.02)     | 0.10    | 0.6         | -0.01 (-0.18, 0.16)     | 0.94    | 1           | -0.11 (-0.24, 0.01)     | 0.06    | 0.42        | 0.03 (-0.08, 0.15)      | 0.59    | 1           |
| <b>Sleep Problems (PSQI)</b>                    | 0.00 (-0.01, 0.02)      | 0.45    | 1           | 0.01 (-0.01, 0.02)      | 0.55    | 1           | -0.01 (-0.02, 0.01)     | 0.40    | 1           | 0.01 ( 0.00, 0.02)      | 0.024   | 0.17        |
| <b>Sleep Apnea High Risk (STOP-BANG)</b>        | -0.08 (-0.19, 0.02)     | 0.12    | 0.84        | 0.06 (-0.09, 0.21)      | 0.42    | 1           | -0.06 (-0.17, 0.04)     | 0.25    | 1           | -0.04 (-0.14, 0.06)     | 0.42    | 1           |
| <b>Controlled Blast Exposure: Low (1-9)</b>     | -0.01 (-0.16, 0.13)     | 0.89    | 1           | 0.08 (-0.13, 0.28)      | 0.47    | 1           | 0.00 (-0.14, 0.15)      | 0.97    | 1           | -0.03 (-0.17, 0.10)     | 0.63    | 1           |
| Medium (10-89)                                  | -0.03 (-0.17, 0.11)     | 0.66    | 1           | -0.04 (-0.24, 0.16)     | 0.72    | 1           | -0.03 (-0.17, 0.11)     | 0.66    | 1           | -0.02 (-0.16, 0.12)     | 0.77    | 1           |
| Heavy (>89)                                     | -0.04 (-0.18, 0.10)     | 0.58    | 1           | -0.03 (-0.24, 0.17)     | 0.75    | 1           | 0.02 (-0.12, 0.17)      | 0.75    | 1           | -0.08 (-0.22, 0.05)     | 0.23    | 1           |
| <b>Somatosensory Symptoms (NSI)</b>             | 0.00 (-0.01, 0.01)      | >0.99   | 1           | 0.00 (-0.02, 0.02)      | 0.97    | 1           | 0.00 (-0.02, 0.01)      | 0.55    | 1           | -0.01 (-0.02, 0.01)     | 0.34    | 1           |
| <b>Vestibular Symptoms (NSI)</b>                | -0.01 (-0.04, 0.01)     | 0.31    | 1           | -0.01 (-0.05, 0.03)     | 0.64    | 1           | -0.02 (-0.05, 0.01)     | 0.11    | 0.66        | -0.01 (-0.04, 0.02)     | 0.52    | 1           |

Notes: Bolded covariates are significant after P < 0.05 corrected for multiple comparisons.

Number of observations used to fit model, in order, are: 1129,1127,1129,1129

**Table S3B. Sensitivity Analysis with # lifetime mTBIs of any etiology as a continuous variable (continued)**

| variable                                        | Executive Function      |         |             | Verbal Fluency          |         |             | Fine Motor & Dexterity  |         |             |
|-------------------------------------------------|-------------------------|---------|-------------|-------------------------|---------|-------------|-------------------------|---------|-------------|
|                                                 | Coefficient<br>(95% CI) | p-value |             | Coefficient<br>(95% CI) | p-value |             | Coefficient<br>(95% CI) | p-value |             |
|                                                 |                         | Raw     | Adjust      |                         | Raw     | Adjust      |                         | Raw     | Adjust      |
| <b>Number of mTBI</b>                           | 0.00 (-0.02, 0.02)      | 0.95    | 1           | 0.01 (-0.01, 0.04)      | 0.26    | 1           | 0.00 (-0.02, 0.03)      | 0.79    | 1           |
| <b>Age</b>                                      | -0.02 (-0.02,-0.01)     | <0.001  | <b>0.01</b> | -0.01 (-0.02,-0.01)     | <0.001  | <b>0.01</b> | -0.03 (-0.04,-0.02)     | <0.001  | <b>0.01</b> |
| <b>Gender: Male</b>                             | -0.06 (-0.17, 0.04)     | 0.23    | 0.69        | 0.05 (-0.11, 0.21)      | 0.56    | 0.69        | -0.27 (-0.44,-0.10)     | 0.002   | <b>0.01</b> |
| <b>Race/Ethnicity: Non-Hispanic White/Asian</b> | 0.15 ( 0.07, 0.22)      | <0.001  | <b>0.01</b> | 0.00 (-0.11, 0.11)      | 0.99    | 0.99        | 0.05 (-0.07, 0.16)      | 0.41    | 0.82        |
| <b>Married: Married/couple</b>                  | 0.01 (-0.06, 0.09)      | 0.76    | 1           | -0.05 (-0.17, 0.07)     | 0.40    | 1           | -0.04 (-0.17, 0.08)     | 0.48    | 1           |
| Never married                                   | -0.05 (-0.15, 0.05)     | 0.36    | 1           | 0.01 (-0.14, 0.17)      | 0.88    | 1           | -0.19 (-0.35,-0.03)     | 0.023   | 0.16        |
| <b>Education: Some College</b>                  | 0.07 (-0.03, 0.17)      | 0.16    | 0.64        | 0.08 (-0.07, 0.23)      | 0.27    | 0.64        | 0.21 ( 0.06, 0.37)      | 0.007   | <b>0.04</b> |
| College Graduate                                | 0.10 ( 0.00, 0.20)      | 0.06    | 0.18        | 0.22 ( 0.07, 0.38)      | 0.005   | <b>0.02</b> | 0.37 ( 0.21, 0.54)      | <0.001  | <b>0.01</b> |
| <b>BMI</b>                                      | 0.00 (-0.01, 0.00)      | 0.24    | 1           | 0.01 ( 0.00, 0.02)      | 0.06    | 0.36        | -0.01 (-0.03, 0.00)     | 0.007   | 0.05        |
| <b>ADHD: Yes</b>                                | -0.10 (-0.22, 0.01)     | 0.09    | 0.54        | -0.03 (-0.22, 0.15)     | 0.71    | 1           | 0.15 (-0.04, 0.34)      | 0.12    | 0.6         |
| <b>Service Branch: Army</b>                     | -0.04 (-0.12, 0.04)     | 0.32    | 1           | -0.09 (-0.22, 0.04)     | 0.18    | 1           | -0.02 (-0.15, 0.11)     | 0.76    | 1           |
| Marine Corps                                    | -0.05 (-0.16, 0.06)     | 0.34    | 1           | -0.09 (-0.27, 0.08)     | 0.29    | 1           | -0.03 (-0.21, 0.15)     | 0.78    | 1           |
| <b>Current Military: Yes</b>                    | 0.01 (-0.07, 0.09)      | 0.85    | 1           | 0.07 (-0.06, 0.20)      | 0.31    | 1           | 0.00 (-0.14, 0.13)      | 0.96    | 1           |
| <b>Deployed Time (yr)</b>                       | 0.00 (-0.03, 0.03)      | 0.91    | 1           | 0.01 (-0.04, 0.06)      | 0.59    | 1           | -0.01 (-0.06, 0.04)     | 0.74    | 1           |
| <b>Combat Intensity (10 × DRR1-2-C)</b>         | 0.01 (-0.01, 0.04)      | 0.27    | 1           | 0.02 (-0.02, 0.06)      | 0.43    | 1           | -0.02 (-0.07, 0.02)     | 0.29    | 1           |
| <b>Depression (PHQ9)</b>                        | -0.01 (-0.02, 0.00)     | 0.16    | 1           | 0.00 (-0.02, 0.01)      | 0.91    | 1           | 0.00 (-0.02, 0.01)      | 0.72    | 1           |
| <b>Pain (TBIQOL)</b>                            | 0.00 ( 0.00, 0.01)      | 0.74    | 1           | 0.00 (-0.01, 0.01)      | 0.73    | 1           | 0.00 ( 0.00, 0.01)      | 0.23    | 1           |
| <b>Premorbid IQ est (NIHTB-CB pic vocab)</b>    | 0.02 ( 0.01, 0.02)      | <0.001  | <b>0.01</b> | 0.03 ( 0.03, 0.04)      | <0.001  | <b>0.01</b> | 0.01 ( 0.01, 0.02)      | <0.001  | <b>0.01</b> |
| <b>PTSD (PCL5)</b>                              | 0.00 (-0.01, 0.00)      | 0.27    | 0.63        | 0.00 (-0.01, 0.00)      | 0.21    | 0.63        | -0.01 (-0.01, 0.00)     | 0.027   | 0.19        |
| <b>ETOH: Yes, non-hazardous</b>                 | -0.05 (-0.11, 0.02)     | 0.20    | 1           | -0.01 (-0.12, 0.10)     | 0.89    | 1           | 0.01 (-0.10, 0.12)      | 0.85    | 1           |
| Not user                                        | -0.07 (-0.16, 0.02)     | 0.12    | 0.6         | -0.03 (-0.17, 0.11)     | 0.67    | 1           | -0.04 (-0.19, 0.11)     | 0.61    | 1           |
| <b>Sleep Problems (PSQI)</b>                    | 0.00 (-0.01, 0.01)      | 0.76    | 1           | 0.00 (-0.02, 0.01)      | 0.82    | 1           | 0.00 (-0.02, 0.01)      | 0.96    | 1           |
| <b>Sleep Apnea High Risk (STOP-BANG)</b>        | 0.04 (-0.04, 0.12)      | 0.31    | 1           | -0.03 (-0.16, 0.09)     | 0.59    | 1           | -0.03 (-0.16, 0.10)     | 0.62    | 1           |
| <b>Controlled Blast Exposure: Low (1-9)</b>     | 0.00 (-0.11, 0.11)      | >0.99   | 1           | -0.11 (-0.29, 0.06)     | 0.20    | 1           | -0.07 (-0.25, 0.11)     | 0.44    | 1           |
| Medium (10-89)                                  | 0.00 (-0.11, 0.10)      | 0.94    | 1           | -0.28 (-0.45,-0.11)     | 0.001   | <b>0.01</b> | 0.03 (-0.14, 0.21)      | 0.70    | 1           |
| Heavy (>89)                                     | -0.02 (-0.13, 0.09)     | 0.78    | 1           | -0.18 (-0.35,-0.01)     | 0.042   | 0.29        | -0.12 (-0.29, 0.06)     | 0.20    | 1           |
| <b>Somatosens Sympt (NSI)</b>                   | -0.01 (-0.02, 0.00)     | 0.06    | 0.42        | 0.00 (-0.02, 0.02)      | 0.83    | 1           | 0.00 (-0.02, 0.01)      | 0.64    | 1           |
| <b>Vestib Sympt (NSI)</b>                       | 0.00 (-0.02, 0.02)      | 0.85    | 1           | -0.02 (-0.06, 0.01)     | 0.18    | 0.9         | -0.05 (-0.09,-0.02)     | 0.003   | 0.02        |

Notes: Bolded covariates are significant after P < 0.05 corrected for multiple comparisons.

Number of observations used to fit model, in order, are: 1129,1127,1129,1129

**Table S4A. Sensitivity Analysis with # blast-related mTBIs as a continuous variable**

| variable                                        | Episodic Memory         |         |             | Attention               |         |             | Processing Speed        |         |             | Working Memory          |         |             |
|-------------------------------------------------|-------------------------|---------|-------------|-------------------------|---------|-------------|-------------------------|---------|-------------|-------------------------|---------|-------------|
|                                                 | Coefficient<br>(95% CI) | p-value |             | Coefficient<br>(95% CI) | p-value |             | Coefficient<br>(95% CI) | p-value |             | Coefficient<br>(95% CI) | p-value |             |
|                                                 |                         | Raw     | Adjust      |
| <b>Number of Blast-related mTBIs</b>            | -0.01 (-0.07, 0.04)     | 0.63    | 1           | -0.01 (-0.09, 0.06)     | 0.76    | 1           | -0.04 (-0.09, 0.02)     | 0.18    | 1           | -0.03 (-0.08, 0.02)     | 0.20    | 1           |
| <b>Age</b>                                      | -0.03 (-0.03,-0.02)     | <0.001  | <b>0.01</b> | -0.03 (-0.04,-0.02)     | <0.001  | <b>0.01</b> | -0.03 (-0.04,-0.03)     | <0.001  | <b>0.01</b> | -0.02 (-0.03,-0.02)     | <0.001  | <b>0.01</b> |
| <b>Gender: Male</b>                             | -0.29 (-0.42,-0.15)     | <0.001  | <b>0.01</b> | -0.09 (-0.29, 0.10)     | 0.34    | 0.69        | -0.36 (-0.50,-0.22)     | <0.001  | <b>0.01</b> | 0.11 (-0.02, 0.24)      | 0.11    | 0.44        |
| <b>Race/Ethnicity: Non-Hispanic White/Asian</b> | 0.07 (-0.02, 0.16)      | 0.15    | 0.52        | 0.17 ( 0.04, 0.30)      | 0.012   | 0.06        | 0.07 (-0.02, 0.17)      | 0.13    | 0.52        | 0.13 ( 0.04, 0.22)      | 0.005   | <b>0.03</b> |
| <b>Married: Married/couple</b>                  | 0.08 (-0.02, 0.18)      | 0.13    | 0.78        | 0.01 (-0.13, 0.16)      | 0.85    | 1           | 0.09 (-0.01, 0.19)      | 0.09    | 0.63        | 0.05 (-0.04, 0.15)      | 0.29    | 1           |
| Never married                                   | 0.04 (-0.09, 0.17)      | 0.58    | 1           | -0.04 (-0.22, 0.15)     | 0.69    | 1           | -0.04 (-0.17, 0.09)     | 0.56    | 1           | 0.03 (-0.10, 0.15)      | 0.66    | 1           |
| <b>Education: Some College</b>                  | -0.04 (-0.16, 0.09)     | 0.55    | 0.64        | 0.12 (-0.06, 0.30)      | 0.18    | 0.64        | 0.11 (-0.02, 0.23)      | 0.10    | 0.5         | 0.25 ( 0.13, 0.37)      | <0.001  | <b>0.01</b> |
| College Graduate                                | -0.02 (-0.15, 0.11)     | 0.74    | 0.74        | 0.11 (-0.08, 0.29)      | 0.25    | 0.5         | 0.21 ( 0.08, 0.34)      | 0.002   | <b>0.01</b> | 0.22 ( 0.09, 0.34)      | <0.001  | <b>0.01</b> |
| <b>BMI</b>                                      | 0.00 (-0.01, 0.01)      | 0.49    | 1           | 0.00 (-0.01, 0.01)      | 0.70    | 1           | 0.00 (-0.01, 0.00)      | 0.37    | 1           | 0.00 (-0.01, 0.01)      | 0.91    | 1           |
| <b>ADD: Yes</b>                                 | -0.16 (-0.32,-0.01)     | 0.038   | 0.27        | 0.06 (-0.16, 0.28)      | 0.59    | 1           | -0.05 (-0.21, 0.10)     | 0.50    | 1           | -0.05 (-0.19, 0.10)     | 0.55    | 1           |
| <b>Service Branch: Army</b>                     | -0.02 (-0.13, 0.09)     | 0.69    | 1           | -0.10 (-0.26, 0.05)     | 0.18    | 1           | -0.03 (-0.14, 0.08)     | 0.60    | 1           | -0.07 (-0.17, 0.04)     | 0.20    | 1           |
| Marine Corps                                    | -0.02 (-0.17, 0.13)     | 0.78    | 1           | 0.10 (-0.11, 0.31)      | 0.34    | 1           | 0.01 (-0.13, 0.16)      | 0.88    | 1           | 0.00 (-0.14, 0.14)      | 0.96    | 1           |
| <b>Current Military: Yes</b>                    | 0.10 ( 0.00, 0.21)      | 0.06    | 0.36        | 0.10 (-0.05, 0.25)      | 0.19    | 0.95        | 0.02 (-0.08, 0.13)      | 0.67    | 1           | 0.13 ( 0.03, 0.24)      | 0.012   | 0.08        |
| <b>Deployed Time (yr)</b>                       | -0.01 (-0.05, 0.04)     | 0.80    | 1           | -0.01 (-0.07, 0.05)     | 0.69    | 1           | 0.04 ( 0.00, 0.08)      | 0.08    | 0.56        | 0.02 (-0.02, 0.06)      | 0.38    | 1           |
| <b>Combat Intensity (10 × DRRI-2-C)</b>         | 0.00 (-0.04, 0.04)      | 0.92    | 1           | 0.04 (-0.01, 0.10)      | 0.10    | 0.6         | 0.02 (-0.02, 0.06)      | 0.28    | 1           | -0.01 (-0.04, 0.03)     | 0.63    | 1           |
| <b>Depression (PHQ9)</b>                        | 0.00 (-0.01, 0.01)      | 0.93    | 1           | -0.01 (-0.03, 0.01)     | 0.39    | 1           | 0.00 (-0.01, 0.01)      | 0.93    | 1           | 0.00 (-0.01, 0.01)      | 0.89    | 1           |
| <b>Pain (TBIQOL)</b>                            | 0.00 ( 0.00, 0.01)      | 0.28    | 1           | 0.00 (-0.01, 0.01)      | 0.50    | 1           | 0.00 ( 0.00, 0.01)      | 0.30    | 1           | 0.00 (-0.01, 0.00)      | 0.35    | 1           |
| <b>Premorbid IQ est (NIHTB-CB pic vocab)</b>    | 0.02 ( 0.02, 0.03)      | <0.001  | <b>0.01</b> | 0.01 ( 0.00, 0.02)      | 0.003   | <b>0.01</b> | 0.01 ( 0.01, 0.02)      | <0.001  | <b>0.01</b> | 0.03 ( 0.02, 0.03)      | <0.001  | <b>0.01</b> |
| <b>PTSD (PCL5)</b>                              | 0.00 (-0.01, 0.00)      | 0.033   | 0.2         | 0.00 (-0.01, 0.00)      | 0.11    | 0.44        | 0.00 (-0.01, 0.00)      | 0.22    | 0.54        | 0.00 (-0.01, 0.00)      | 0.039   | 0.2         |
| <b>ETOH: Yes, non-hazardous</b>                 | -0.03 (-0.12, 0.06)     | 0.56    | 1           | -0.02 (-0.14, 0.11)     | 0.81    | 1           | -0.03 (-0.12, 0.06)     | 0.55    | 1           | 0.03 (-0.05, 0.12)      | 0.47    | 1           |
| Not user                                        | -0.10 (-0.22, 0.02)     | 0.09    | 0.56        | -0.01 (-0.17, 0.16)     | 0.95    | 1           | -0.11 (-0.23, 0.01)     | 0.08    | 0.56        | 0.03 (-0.08, 0.15)      | 0.60    | 1           |
| <b>Sleep Problems (PSQI)</b>                    | 0.01 (-0.01, 0.02)      | 0.41    | 1           | 0.01 (-0.01, 0.02)      | 0.55    | 1           | -0.01 (-0.02, 0.01)     | 0.39    | 1           | 0.01 ( 0.00, 0.03)      | 0.019   | 0.13        |
| <b>Sleep Apnea High Risk (STOP-BANG)</b>        | -0.08 (-0.19, 0.02)     | 0.13    | 0.91        | 0.06 (-0.09, 0.21)      | 0.41    | 1           | -0.06 (-0.17, 0.05)     | 0.26    | 1           | -0.04 (-0.14, 0.06)     | 0.46    | 1           |
| <b>Controlled Blast Exposure: Low (1-9)</b>     | -0.01 (-0.16, 0.13)     | 0.87    | 1           | 0.07 (-0.13, 0.28)      | 0.47    | 1           | 0.00 (-0.14, 0.15)      | >0.99   | 1           | -0.04 (-0.18, 0.10)     | 0.60    | 1           |
| Medium (10-89)                                  | -0.03 (-0.17, 0.11)     | 0.65    | 1           | -0.04 (-0.24, 0.16)     | 0.72    | 1           | -0.03 (-0.18, 0.11)     | 0.64    | 1           | -0.02 (-0.16, 0.11)     | 0.75    | 1           |
| Heavy (>89)                                     | -0.04 (-0.19, 0.10)     | 0.56    | 1           | -0.03 (-0.24, 0.17)     | 0.75    | 1           | 0.02 (-0.12, 0.17)      | 0.75    | 1           | -0.09 (-0.22, 0.05)     | 0.22    | 1           |
| <b>Somatosens Sympt (NSI)</b>                   | 0.00 (-0.01, 0.02)      | 0.91    | 1           | 0.00 (-0.02, 0.02)      | 0.98    | 1           | 0.00 (-0.02, 0.01)      | 0.58    | 1           | -0.01 (-0.02, 0.01)     | 0.45    | 1           |
| <b>Vestib Sympt (NSI)</b>                       | -0.01 (-0.04, 0.02)     | 0.37    | 1           | -0.01 (-0.05, 0.03)     | 0.64    | 1           | -0.02 (-0.05, 0.01)     | 0.11    | 0.66        | -0.01 (-0.03, 0.02)     | 0.64    | 1           |

Notes: Bolded covariates are significant after P < 0.05 corrected for multiple comparisons.

Number of observations used to fit model, in order, are: 1129,1127,1129,1129

**Table S4B. Sensitivity Analysis with # blast-related mTBIs as a continuous variable (continued)**

| variable                                        | Executive Function      |         |             | Verbal Fluency          |         |             | Fine Motor & Dexterity  |         |             |
|-------------------------------------------------|-------------------------|---------|-------------|-------------------------|---------|-------------|-------------------------|---------|-------------|
|                                                 | Coefficient<br>(95% CI) | p-value |             | Coefficient<br>(95% CI) | p-value |             | Coefficient<br>(95% CI) | p-value |             |
|                                                 |                         | Raw     | Adjust      |                         | Raw     | Adjust      |                         | Raw     | Adjust      |
| <b>Number of Blast-related mTBI</b>             | 0.00 (-0.04, 0.04)      | 0.96    | 1           | -0.07 (-0.13,-0.01)     | 0.028   | 0.2         | -0.03 (-0.09, 0.04)     | 0.44    | 1           |
| <b>Age</b>                                      | -0.02 (-0.02,-0.01)     | <0.001  | <b>0.01</b> | -0.01 (-0.02,-0.01)     | <0.001  | <b>0.01</b> | -0.03 (-0.04,-0.02)     | <0.001  | <b>0.01</b> |
| <b>Gender: Male</b>                             | -0.06 (-0.17, 0.04)     | 0.23    | 0.69        | 0.07 (-0.09, 0.24)      | 0.39    | 0.69        | -0.26 (-0.43,-0.09)     | 0.003   | 0.01        |
| <b>Race/Ethnicity: Non-Hispanic White/Asian</b> | 0.15 ( 0.07, 0.22)      | <0.001  | <b>0.01</b> | 0.01 (-0.11, 0.12)      | 0.92    | 0.92        | 0.05 (-0.06, 0.17)      | 0.39    | 0.78        |
| <b>Married: Married/couple</b>                  | 0.01 (-0.06, 0.09)      | 0.76    | 1           | -0.05 (-0.17, 0.07)     | 0.45    | 1           | -0.04 (-0.17, 0.08)     | 0.50    | 1           |
| Never married                                   | -0.05 (-0.15, 0.05)     | 0.36    | 1           | 0.02 (-0.14, 0.17)      | 0.82    | 1           | -0.19 (-0.35,-0.02)     | 0.024   | 0.17        |
| <b>Education: Some College</b>                  | 0.07 (-0.03, 0.17)      | 0.16    | 0.64        | 0.10 (-0.05, 0.25)      | 0.17    | 0.64        | 0.22 ( 0.07, 0.38)      | 0.005   | <b>0.03</b> |
| College Graduate                                | 0.10 ( 0.00, 0.20)      | 0.06    | 0.18        | 0.24 ( 0.09, 0.40)      | 0.002   | <b>0.01</b> | 0.38 ( 0.22, 0.54)      | <0.001  | <b>0.01</b> |
| <b>BMI</b>                                      | 0.00 (-0.01, 0.00)      | 0.24    | 1           | 0.01 ( 0.00, 0.02)      | 0.11    | 0.66        | -0.02 (-0.03, 0.00)     | 0.006   | <b>0.04</b> |
| <b>ADD: Yes</b>                                 | -0.10 (-0.22, 0.01)     | 0.09    | 0.54        | -0.03 (-0.21, 0.15)     | 0.76    | 1           | 0.15 (-0.04, 0.34)      | 0.11    | 0.55        |
| <b>Service Branch: Army</b>                     | -0.04 (-0.12, 0.04)     | 0.32    | 1           | -0.10 (-0.22, 0.03)     | 0.15    | 1           | -0.02 (-0.16, 0.11)     | 0.73    | 1           |
| Marine Corps                                    | -0.05 (-0.17, 0.06)     | 0.34    | 1           | -0.11 (-0.28, 0.06)     | 0.21    | 1           | -0.03 (-0.21, 0.15)     | 0.73    | 1           |
| <b>Current Military: Yes</b>                    | 0.01 (-0.07, 0.09)      | 0.84    | 1           | 0.08 (-0.05, 0.21)      | 0.22    | 0.95        | 0.00 (-0.13, 0.13)      | >0.99   | 1           |
| <b>Deployed Time (yr)</b>                       | 0.00 (-0.03, 0.03)      | 0.91    | 1           | 0.02 (-0.03, 0.07)      | 0.47    | 1           | -0.01 (-0.06, 0.04)     | 0.78    | 1           |
| <b>Combat Intensity (10 × DRR1-2-C)</b>         | 0.02 (-0.01, 0.04)      | 0.29    | 1           | 0.04 ( 0.00, 0.08)      | 0.07    | 0.49        | -0.01 (-0.06, 0.03)     | 0.53    | 1           |
| <b>Depression (PHQ9)</b>                        | -0.01 (-0.02, 0.00)     | 0.16    | 1           | 0.00 (-0.02, 0.01)      | 0.84    | 1           | 0.00 (-0.02, 0.01)      | 0.70    | 1           |
| <b>Pain (TBIQOL)</b>                            | 0.00 ( 0.00, 0.01)      | 0.74    | 1           | 0.00 (-0.01, 0.01)      | 0.71    | 1           | 0.00 ( 0.00, 0.01)      | 0.24    | 1           |
| <b>Premorbid IQ est (NIHTB-CB pic vocab)</b>    | 0.02 ( 0.01, 0.02)      | <0.001  | <b>0.01</b> | 0.03 ( 0.03, 0.04)      | <0.001  | <b>0.01</b> | 0.01 ( 0.01, 0.02)      | <0.001  | <b>0.01</b> |
| <b>PTSD (PCL5)</b>                              | 0.00 (-0.01, 0.00)      | 0.27    | 0.54        | 0.00 (-0.01, 0.00)      | 0.18    | 0.54        | -0.01 (-0.01, 0.00)     | 0.025   | 0.18        |
| <b>ETOH: Yes, non-hazardous</b>                 | -0.05 (-0.11, 0.02)     | 0.20    | 1           | -0.01 (-0.12, 0.10)     | 0.88    | 1           | 0.01 (-0.10, 0.12)      | 0.85    | 1           |
| Not user                                        | -0.07 (-0.16, 0.02)     | 0.12    | 0.6         | -0.03 (-0.18, 0.11)     | 0.65    | 1           | -0.04 (-0.19, 0.11)     | 0.61    | 1           |
| <b>Sleep Problems (PSQI)</b>                    | 0.00 (-0.01, 0.01)      | 0.76    | 1           | 0.00 (-0.01, 0.01)      | 0.95    | 1           | 0.00 (-0.01, 0.01)      | >0.99   | 1           |
| <b>Sleep Apnea High Risk (STOP-BANG)</b>        | 0.04 (-0.04, 0.12)      | 0.31    | 1           | -0.03 (-0.15, 0.10)     | 0.69    | 1           | -0.03 (-0.16, 0.10)     | 0.65    | 1           |
| <b>Controlled Blast Exposure: Low (1-9)</b>     | 0.00 (-0.11, 0.11)      | >0.99   | 1           | -0.12 (-0.29, 0.05)     | 0.17    | 1           | -0.07 (-0.25, 0.11)     | 0.42    | 1           |
| Medium (10-89)                                  | 0.00 (-0.11, 0.10)      | 0.93    | 1           | -0.29 (-0.45,-0.12)     | <0.001  | <b>0.01</b> | 0.03 (-0.14, 0.21)      | 0.71    | 1           |
| Heavy (>89)                                     | -0.02 (-0.13, 0.09)     | 0.78    | 1           | -0.18 (-0.36,-0.01)     | 0.035   | 0.25        | -0.12 (-0.30, 0.06)     | 0.20    | 1           |
| <b>Somatosens Sympt (NSI)</b>                   | -0.01 (-0.02, 0.00)     | 0.06    | 0.42        | 0.00 (-0.01, 0.02)      | 0.60    | 1           | 0.00 (-0.02, 0.01)      | 0.71    | 1           |
| <b>Vestib Sympt (NSI)</b>                       | 0.00 (-0.04, 0.04)      | 0.96    | 1           | -0.07 (-0.13,-0.01)     | 0.028   | 0.2         | -0.03 (-0.09, 0.04)     | 0.44    | 1           |

Notes: Bolded covariates are significant after P < 0.05 corrected for multiple comparisons.  
 Number of observations used to fit model, in order, are: 1129,1127,1129,1129

**Table S5. Variance Inflation factor (VIF) for Number of Blast-related mTBIs:**

|                                          | <b>Episodic<br/>Memory</b> | <b>Attention</b> | <b>Processing<br/>Speed</b> | <b>Working<br/>Memory</b> | <b>Executive<br/>Function</b> | <b>Verbal<br/>Fluency</b> | <b>Fine Motor<br/>&amp; Dexterity</b> |
|------------------------------------------|----------------------------|------------------|-----------------------------|---------------------------|-------------------------------|---------------------------|---------------------------------------|
| Number of Blast mTBIs                    | 1.2                        | 1.2              | 1.2                         | 1.2                       | 1.2                           | 1.2                       | 1.2                                   |
| Age                                      | 1.3                        | 1.3              | 1.3                         | 1.3                       | 1.3                           | 1.3                       | 1.3                                   |
| Gender                                   | 1.2                        | 1.2              | 1.2                         | 1.2                       | 1.2                           | 1.2                       | 1.2                                   |
| Race/Ethnicity                           | 1.1                        | 1.1              | 1.1                         | 1.1                       | 1.1                           | 1.1                       | 1.1                                   |
| Married                                  | 1.1                        | 1.1              | 1.1                         | 1.1                       | 1.1                           | 1.1                       | 1.1                                   |
| Education                                | 1.1                        | 1.1              | 1.1                         | 1.1                       | 1.1                           | 1.1                       | 1.1                                   |
| BMI                                      | 1.1                        | 1.1              | 1.1                         | 1.1                       | 1.1                           | 1.1                       | 1.1                                   |
| ADD                                      | 1                          | 1                | 1                           | 1                         | 1                             | 1                         | 1                                     |
| Service Branch                           | 1.1                        | 1.1              | 1.1                         | 1.1                       | 1.1                           | 1.1                       | 1.1                                   |
| Current Military                         | 1.1                        | 1.1              | 1.1                         | 1.1                       | 1.1                           | 1.1                       | 1.1                                   |
| Deployed duration (years)                | 1.2                        | 1.2              | 1.2                         | 1.2                       | 1.2                           | 1.2                       | 1.2                                   |
| Combat Intensity (DRRI-2-C)              | 1.4                        | 1.4              | 1.4                         | 1.4                       | 1.4                           | 1.4                       | 1.4                                   |
| Depression (PHQ9)                        | 1.9                        | 1.9              | 1.9                         | 1.9                       | 1.9                           | 1.9                       | 1.9                                   |
| Pain Interference (TBIQOL)               | 1.5                        | 1.5              | 1.5                         | 1.5                       | 1.5                           | 1.5                       | 1.5                                   |
| Premorbid IQ est<br>(NIHTB-CB pic vocab) | 1.2                        | 1.2              | 1.2                         | 1.2                       | 1.2                           | 1.2                       | 1.2                                   |
| PTSD (PCL5)                              | 2                          | 2                | 2                           | 2                         | 2                             | 2                         | 2                                     |
| ETOH use (AUDIT-C)                       | 1                          | 1                | 1                           | 1                         | 1                             | 1                         | 1                                     |
| Sleep Problems (PSQI)                    | 1.4                        | 1.4              | 1.4                         | 1.4                       | 1.4                           | 1.4                       | 1.4                                   |
| Sleep Apnea High Risk (STOP-BANG)        | 1.3                        | 1.3              | 1.3                         | 1.3                       | 1.3                           | 1.3                       | 1.3                                   |
| Controlled Blast Exposures               | 1.1                        | 1.1              | 1.1                         | 1.1                       | 1.1                           | 1.1                       | 1.1                                   |
| Somatosensory Symptoms (NSI)             | 1.8                        | 1.8              | 1.8                         | 1.8                       | 1.8                           | 1.8                       | 1.8                                   |
| Vestibular Symptoms (NSI)                | 1.5                        | 1.5              | 1.5                         | 1.5                       | 1.5                           | 1.5                       | 1.5                                   |

Note: Table values are generalized VIF,  $GVIF^{1/(2 \cdot Df)}$ . If this value  $< 2.4$ , there is no evidence of multicollinearity. The threshold is equivalent to conventional  $VIF < 5$ .

**Table S6A. Sensitivity Analysis with TBI negative controls removed and # years since mTBI added as covariates**

| variable                                        | Episodic Memory         |         |             | Attention               |         |             | Processing Speed        |         |             | Working Memory          |         |             |
|-------------------------------------------------|-------------------------|---------|-------------|-------------------------|---------|-------------|-------------------------|---------|-------------|-------------------------|---------|-------------|
|                                                 | Coefficient<br>(95% CI) | p-value |             | Coefficient<br>(95% CI) | p-value |             | Coefficient<br>(95% CI) | p-value |             | Coefficient<br>(95% CI) | p-value |             |
|                                                 |                         | Raw     | Adjust      |
| <b>Groups: 3+ mTBIs</b>                         | -0.09 (-0.21, 0.03)     | 0.15    | 0.75        | 0.15 (-0.02, 0.32)      | 0.08    | 0.48        | -0.04 (-0.16, 0.08)     | 0.53    | 1           | -0.05 (-0.16, 0.07)     | 0.41    | 1           |
| <b>Age</b>                                      | -0.03 (-0.04,-0.02)     | <0.001  | <b>0.01</b> | -0.03 (-0.04,-0.02)     | <0.001  | <b>0.01</b> | -0.03 (-0.04,-0.03)     | <0.001  | <b>0.01</b> | -0.03 (-0.03,-0.02)     | <0.001  | <b>0.01</b> |
| <b>Gender: Male</b>                             | -0.18 (-0.34,-0.02)     | 0.030   | 0.15        | 0.02 (-0.21, 0.25)      | 0.84    | 1           | -0.35 (-0.51,-0.19)     | <0.001  | <b>0.01</b> | 0.08 (-0.07, 0.24)      | 0.30    | 1           |
| <b>Race/Ethnicity: Non-Hispanic White/Asian</b> | 0.06 (-0.05, 0.16)      | 0.28    | 0.76        | 0.20 ( 0.05, 0.35)      | 0.008   | 0.05        | 0.07 (-0.03, 0.17)      | 0.19    | 0.76        | 0.09 (-0.01, 0.19)      | 0.07    | 0.35        |
| <b>Married: Married/couple</b>                  | 0.08 (-0.04, 0.19)      | 0.18    | 1           | -0.02 (-0.18, 0.14)     | 0.83    | 1           | 0.08 (-0.03, 0.19)      | 0.17    | 1           | 0.05 (-0.06, 0.16)      | 0.34    | 1           |
| Never married                                   | 0.07 (-0.08, 0.22)      | 0.34    | 1           | -0.02 (-0.23, 0.18)     | 0.82    | 1           | -0.04 (-0.19, 0.11)     | 0.58    | 1           | 0.01 (-0.13, 0.15)      | 0.92    | 1           |
| <b>Education: Some College</b>                  | 0.00 (-0.14, 0.14)      | 0.99    | 1           | 0.14 (-0.06, 0.34)      | 0.17    | 0.68        | 0.10 (-0.05, 0.24)      | 0.18    | 0.68        | 0.22 ( 0.08, 0.36)      | 0.002   | <b>0.01</b> |
| College Graduate                                | -0.01 (-0.16, 0.14)     | 0.86    | 0.86        | 0.19 (-0.02, 0.40)      | 0.08    | 0.32        | 0.22 ( 0.07, 0.37)      | 0.004   | <b>0.02</b> | 0.22 ( 0.08, 0.36)      | 0.003   | <b>0.02</b> |
| <b>BMI</b>                                      | 0.01 ( 0.00, 0.02)      | 0.29    | 1           | 0.00 (-0.01, 0.01)      | 0.91    | 1           | 0.00 (-0.01, 0.01)      | 0.84    | 1           | 0.00 (-0.01, 0.01)      | 0.45    | 1           |
| <b>ADD: Yes</b>                                 | -0.18 (-0.34,-0.01)     | 0.039   | 0.27        | 0.05 (-0.19, 0.28)      | 0.70    | 1           | -0.08 (-0.25, 0.08)     | 0.33    | 1           | -0.06 (-0.22, 0.10)     | 0.46    | 1           |
| <b>Service Branch: Army</b>                     | -0.06 (-0.18, 0.07)     | 0.37    | 1           | -0.04 (-0.22, 0.13)     | 0.63    | 1           | 0.00 (-0.13, 0.12)      | 0.96    | 1           | -0.09 (-0.21, 0.03)     | 0.13    | 0.91        |
| Marine Corps                                    | -0.04 (-0.21, 0.12)     | 0.61    | 1           | 0.16 (-0.07, 0.39)      | 0.18    | 1           | 0.06 (-0.10, 0.22)      | 0.46    | 1           | -0.05 (-0.21, 0.10)     | 0.50    | 1           |
| <b>Current Military: Yes</b>                    | 0.07 (-0.04, 0.19)      | 0.22    | 1           | 0.09 (-0.07, 0.26)      | 0.28    | 1           | 0.00 (-0.11, 0.12)      | 0.94    | 1           | 0.08 (-0.04, 0.19)      | 0.19    | 1           |
| <b>Deployed Time (yr)</b>                       | 0.00 (-0.04, 0.05)      | 0.88    | 1           | -0.02 (-0.08, 0.05)     | 0.60    | 1           | 0.05 ( 0.01, 0.10)      | 0.026   | 0.18        | 0.01 (-0.03, 0.06)      | 0.55    | 1           |
| <b>Combat Intensity (10 × DRRI-2-C)</b>         | -0.01 (-0.05, 0.02)     | 0.45    | 1           | 0.04 (-0.01, 0.09)      | 0.14    | 0.98        | 0.00 (-0.04, 0.04)      | 0.96    | 1           | -0.01 (-0.05, 0.03)     | 0.57    | 1           |
| <b>Depression (PHQ9)</b>                        | 0.00 (-0.01, 0.01)      | 0.87    | 1           | -0.02 (-0.03, 0.00)     | 0.12    | 0.84        | 0.00 (-0.02, 0.01)      | 0.81    | 1           | 0.01 (-0.01, 0.02)      | 0.42    | 1           |
| <b>Pain (TBIQOL)</b>                            | 0.00 ( 0.00, 0.01)      | 0.23    | 1           | 0.00 (-0.01, 0.01)      | 0.69    | 1           | 0.00 ( 0.00, 0.01)      | 0.23    | 1           | 0.00 (-0.01, 0.00)      | 0.32    | 1           |
| <b>Premorbid IQ est (NIHTB-CB pic vocab)</b>    | 0.03 ( 0.02, 0.03)      | <0.001  | <b>0.01</b> | 0.01 ( 0.00, 0.02)      | 0.012   | <b>0.02</b> | 0.01 ( 0.01, 0.02)      | <0.001  | <b>0.01</b> | 0.03 ( 0.02, 0.04)      | <0.001  | <b>0.01</b> |
| <b>PTSD (PCL5)</b>                              | 0.00 (-0.01, 0.00)      | 0.10    | 0.6         | 0.00 (-0.01, 0.00)      | 0.40    | 1           | 0.00 (-0.01, 0.00)      | 0.51    | 1           | 0.00 (-0.01, 0.00)      | 0.054   | 0.38        |
| <b>ETOH: Yes, non-hazardous</b>                 | -0.05 (-0.15, 0.06)     | 0.38    | 1           | -0.02 (-0.16, 0.12)     | 0.80    | 1           | -0.04 (-0.14, 0.06)     | 0.42    | 1           | 0.01 (-0.09, 0.11)      | 0.85    | 1           |
| Not user                                        | -0.13 (-0.27, 0.00)     | 0.06    | 0.36        | -0.05 (-0.24, 0.14)     | 0.58    | 1           | -0.14 (-0.27, 0.00)     | 0.048   | 0.34        | -0.01 (-0.14, 0.12)     | 0.83    | 1           |
| <b>Sleep Problems (PSQI)</b>                    | 0.01 ( 0.00, 0.02)      | 0.16    | 0.96        | 0.01 (-0.01, 0.03)      | 0.32    | 1           | 0.00 (-0.02, 0.01)      | 0.60    | 1           | 0.01 ( 0.00, 0.02)      | 0.08    | 0.56        |
| <b>Sleep Apnea High Risk (STOP-BANG)</b>        | -0.06 (-0.18, 0.06)     | 0.34    | 1           | 0.12 (-0.04, 0.29)      | 0.15    | 1           | -0.08 (-0.20, 0.04)     | 0.18    | 1           | -0.03 (-0.14, 0.09)     | 0.66    | 1           |
| <b>Controlled Blast Exposure: Low (1-9)</b>     | 0.05 (-0.07, 0.16)      | 0.43    | 1           | 0.09 (-0.07, 0.26)      | 0.28    | 1           | -0.03 (-0.14, 0.09)     | 0.67    | 1           | 0.07 (-0.05, 0.18)      | 0.26    | 1           |
| Medium (10-89)                                  | 0.00 (-0.13, 0.13)      | 0.95    | 1           | -0.02 (-0.20, 0.16)     | 0.80    | 1           | -0.05 (-0.18, 0.08)     | 0.43    | 1           | 0.04 (-0.08, 0.17)      | 0.48    | 1           |
| Heavy (>89)                                     | 0.04 (-0.12, 0.20)      | 0.66    | 1           | 0.02 (-0.21, 0.25)      | 0.86    | 1           | -0.04 (-0.20, 0.12)     | 0.61    | 1           | 0.09 (-0.06, 0.25)      | 0.23    | 1           |
| <b>Somsens Sympt (NSI)</b>                      | 0.00 (-0.02, 0.01)      | 0.89    | 1           | 0.00 (-0.02, 0.02)      | 0.91    | 1           | -0.01 (-0.02, 0.01)     | 0.49    | 1           | -0.01 (-0.03, 0.00)     | 0.18    | 1           |
| <b>Vestib Sympt (NSI)</b>                       | -0.01 (-0.04, 0.02)     | 0.70    | 1           | -0.02 (-0.06, 0.03)     | 0.48    | 1           | -0.02 (-0.05, 0.01)     | 0.23    | 1           | -0.01 (-0.04, 0.02)     | 0.67    | 1           |
| <b>First TBI (yrs. since)</b>                   | 0.01 ( 0.00, 0.01)      | 0.021   | 0.15        | 0.00 (-0.01, 0.01)      | 0.84    | 1           | 0.00 ( 0.00, 0.01)      | 0.55    | 1           | 0.01 ( 0.00, 0.01)      | 0.06    | 0.36        |
| <b>Last TBI (yrs. since)</b>                    | -0.01 (-0.02, 0.00)     | 0.009   | 0.06        | 0.01 ( 0.00, 0.02)      | 0.23    | 1           | 0.00 (-0.01, 0.01)      | 0.71    | 1           | 0.00 (-0.01, 0.00)      | 0.33    | 1           |

Notes: Bolded covariates are significant after P < 0.05 corrected for multiple comparisons.

Number of observations used to fit model, in order, are: 1129,1127,1129,1129



**Table S6B. Sensitivity Analysis with TBI negative controls removed and # years since mTBI added as covariates (continued)**

| variable                                        | Executive Function      |         |             | Verbal Fluency          |         |             | Fine Motor & Dexterity  |         |             |
|-------------------------------------------------|-------------------------|---------|-------------|-------------------------|---------|-------------|-------------------------|---------|-------------|
|                                                 | Coefficient<br>(95% CI) | p-value |             | Coefficient<br>(95% CI) | p-value |             | Coefficient<br>(95% CI) | p-value |             |
|                                                 |                         | Raw     | Adjust      |                         | Raw     | Adjust      |                         | Raw     | Adjust      |
| <b>Groups: 3+ mTBIs</b>                         | 0.03 (-0.06, 0.13)      | 0.49    | 1           | 0.18 ( 0.03, 0.32)      | 0.015   | 0.1         | 0.04 (-0.10, 0.19)      | 0.56    | 1           |
| <b>Age</b>                                      | -0.02 (-0.03,-0.01)     | <0.001  | <b>0.01</b> | -0.02 (-0.02,-0.01)     | <0.001  | <b>0.01</b> | -0.04 (-0.05,-0.03)     | <0.001  | <b>0.01</b> |
| <b>Gender: Male</b>                             | -0.04 (-0.17, 0.09)     | 0.54    | 1           | -0.02 (-0.22, 0.17)     | 0.83    | 1           | -0.31 (-0.51,-0.10)     | 0.004   | <b>0.02</b> |
| <b>Race/Ethnicity: Non-Hispanic White/Asian</b> | 0.14 ( 0.06, 0.23)      | <0.001  | <b>0.01</b> | 0.02 (-0.11, 0.14)      | 0.77    | 0.77        | 0.08 (-0.05, 0.21)      | 0.22    | 0.76        |
| <b>Married: Married/couple</b>                  | -0.01 (-0.10, 0.08)     | 0.85    | 1           | -0.08 (-0.22, 0.05)     | 0.22    | 1           | -0.05 (-0.19, 0.10)     | 0.54    | 1           |
| Never married                                   | -0.07 (-0.18, 0.05)     | 0.26    | 1           | -0.02 (-0.19, 0.16)     | 0.87    | 1           | -0.18 (-0.37, 0.01)     | 0.06    | 0.42        |
| <b>Education: Some College</b>                  | 0.10 (-0.02, 0.21)      | 0.10    | 0.5         | 0.04 (-0.13, 0.21)      | 0.67    | 1           | 0.17 (-0.01, 0.36)      | 0.06    | 0.36        |
| College Graduate                                | 0.10 (-0.02, 0.21)      | 0.11    | 0.32        | 0.16 (-0.02, 0.33)      | 0.08    | 0.32        | 0.34 ( 0.15, 0.53)      | <0.001  | <b>0.01</b> |
| <b>BMI</b>                                      | 0.00 (-0.01, 0.00)      | 0.26    | 1           | 0.00 (-0.01, 0.01)      | 0.59    | 1           | -0.01 (-0.03, 0.00)     | 0.028   | 0.2         |
| <b>ADD: Yes</b>                                 | -0.12 (-0.25, 0.01)     | 0.08    | 0.48        | -0.11 (-0.31, 0.09)     | 0.27    | 1           | 0.15 (-0.06, 0.36)      | 0.17    | 0.85        |
| <b>Service Branch: Army</b>                     | -0.03 (-0.13, 0.07)     | 0.53    | 1           | -0.06 (-0.21, 0.09)     | 0.45    | 1           | -0.03 (-0.18, 0.13)     | 0.74    | 1           |
| Marine Corps                                    | -0.03 (-0.16, 0.10)     | 0.69    | 1           | -0.06 (-0.26, 0.13)     | 0.53    | 1           | -0.03 (-0.24, 0.17)     | 0.74    | 1           |
| <b>Current Military: Yes</b>                    | 0.01 (-0.08, 0.11)      | 0.80    | 1           | 0.03 (-0.11, 0.17)      | 0.67    | 1           | 0.04 (-0.11, 0.19)      | 0.59    | 1           |
| <b>Deployed Time (yr)</b>                       | 0.00 (-0.04, 0.03)      | 0.82    | 1           | 0.03 (-0.03, 0.08)      | 0.32    | 1           | 0.01 (-0.05, 0.07)      | 0.73    | 1           |
| <b>Combat Intensity (10 × DRR1-2-C)</b>         | 0.02 (-0.01, 0.05)      | 0.15    | 0.98        | 0.00 (-0.04, 0.05)      | 0.94    | 1           | -0.01 (-0.06, 0.04)     | 0.61    | 1           |
| <b>Depression (PHQ9)</b>                        | -0.01 (-0.02, 0.00)     | 0.19    | 1           | 0.00 (-0.02, 0.02)      | 0.92    | 1           | -0.01 (-0.03, 0.01)     | 0.35    | 1           |
| <b>Pain (TBIQOL)</b>                            | 0.00 ( 0.00, 0.01)      | 0.57    | 1           | 0.00 (-0.01, 0.01)      | 0.65    | 1           | 0.00 ( 0.00, 0.01)      | 0.32    | 1           |
| <b>Premorbid IQ est (NIHTB-CB pic vocab)</b>    | 0.02 ( 0.01, 0.02)      | <0.001  | <b>0.01</b> | 0.03 ( 0.03, 0.04)      | <0.001  | <b>0.01</b> | 0.01 ( 0.00, 0.02)      | 0.018   | <b>0.02</b> |
| <b>PTSD (PCL5)</b>                              | 0.00 (-0.01, 0.00)      | 0.37    | 1           | 0.00 (-0.01, 0.00)      | 0.40    | 1           | 0.00 (-0.01, 0.00)      | 0.14    | 0.7         |
| <b>ETOH: Yes, non-hazardous</b>                 | -0.06 (-0.14, 0.02)     | 0.15    | 1           | -0.03 (-0.15, 0.09)     | 0.66    | 1           | 0.04 (-0.09, 0.17)      | 0.55    | 1           |
| Not user                                        | -0.09 (-0.20, 0.02)     | 0.10    | 0.5         | -0.02 (-0.18, 0.14)     | 0.81    | 1           | 0.00 (-0.17, 0.17)      | 0.99    | 1           |
| <b>Sleep Problems (PSQI)</b>                    | 0.00 (-0.01, 0.01)      | 0.86    | 1           | -0.01 (-0.02, 0.01)     | 0.48    | 1           | 0.00 (-0.02, 0.02)      | 0.94    | 1           |
| <b>Sleep Apnea High Risk (STOP-BANG)</b>        | 0.07 (-0.03, 0.16)      | 0.17    | 1           | 0.04 (-0.10, 0.18)      | 0.57    | 1           | 0.01 (-0.14, 0.16)      | 0.90    | 1           |
| <b>Controlled Blast Exposure: Low (1-9)</b>     | 0.01 (-0.08, 0.10)      | 0.85    | 1           | 0.10 (-0.04, 0.24)      | 0.15    | 1           | 0.05 (-0.10, 0.19)      | 0.55    | 1           |
| Medium (10-89)                                  | -0.01 (-0.11, 0.09)     | 0.86    | 1           | -0.10 (-0.26, 0.05)     | 0.19    | 1           | 0.12 (-0.05, 0.28)      | 0.16    | 1           |
| Heavy (>89)                                     | 0.01 (-0.12, 0.13)      | 0.92    | 1           | 0.15 (-0.04, 0.35)      | 0.11    | 0.77        | 0.02 (-0.18, 0.22)      | 0.86    | 1           |
| <b>Somsens Sympt (NSI)</b>                      | -0.01 (-0.02, 0.00)     | 0.11    | 0.77        | -0.01 (-0.03, 0.01)     | 0.32    | 1           | -0.01 (-0.03, 0.01)     | 0.56    | 1           |
| <b>Vestib Sympt (NSI)</b>                       | -0.01 (-0.03, 0.02)     | 0.63    | 1           | -0.01 (-0.05, 0.02)     | 0.43    | 1           | -0.04 (-0.08,-0.01)     | 0.023   | 0.16        |
| <b>First TBI (yrs. since)</b>                   | 0.00 ( 0.00, 0.01)      | 0.41    | 1           | 0.00 (-0.01, 0.01)      | 0.55    | 1           | 0.00 (-0.01, 0.01)      | 0.75    | 1           |
| <b>Last TBI (yrs. since)</b>                    | 0.00 ( 0.00, 0.01)      | 0.68    | 1           | 0.01 ( 0.00, 0.01)      | 0.19    | 1           | 0.00 ( 0.00, 0.01)      | 0.35    | 1           |

Notes: Bolded covariates are significant after P < 0.05 corrected for multiple comparisons.

Number of observations used to fit model, in order, are: 1129,1127,1129,1129
